# Supplementary material
Source: Research Square preprint supplement (doi:10.21203/rs.3.rs-8982208/v1)
Supplement: Supplementary file 1 [file 49dfc3ec4fcb5618021f52c3.docx]

**Supplemental Table 1: *Saccharomyces cerevisiae* strains**

Number Genotype* Source

yCHS1 *Matα-inc/a-inc ade2-1/ade2-1 can1-100/can1-100* [9]

*his3∆3'-(311bp)-Hocs(117bp)/his3∆5' trp1::KANMX-GALHO/trp1-1*

*ura3-1/ura3-1 leu2-3,112/leu2-3,112 rev1::URA3/REV1*

*met22::TRP1/MET22*

yCHS63 *Matα-inc/a-inc ade2-1/ade2-1 can1-100/can1-100* This Study

*his3∆3'-(25bp)-HOcs(117bp)/his3Δ5' trp1::KANMX-GALHO/trp1-1*

*ura3::TRIP1/ura3-1 leu2-3,112/leu2-3,112*

yCHS65 *Matα-inc/a-inc ade2-1/ade2-1 can1-100/can1-100* This Study

*his3∆3'-(20bp)-HOcs(117bp)/his3Δ5' trp1::KANMX-GALHO/trp1-1*

*ura3::TRIP1/ura3-1 leu2-3,112/leu2-3,112*

yCHS66 *Matα-inc/a-inc ade2-1/ade2-1 can1-100/can1-100* This Study

*his3∆3'-(14-2-4bp)-HOcs(117bp)/his3Δ5' trp1::KANMX-GALHO/trp1-1*

*ura3::TRIP1/ura3-1 leu2-3,112/leu2-3,112*

yCHS68 *Matα-inc/a-inc ade2-1/ade2-1 can1-100/can1-100* This Study

*his3∆3'-(14-2-2bp)-HOcs(117bp)/his3Δ5' trp1::KANMX-GALHO/trp1-1*

*ura3::TRIP1/ura3-1 leu2-3,112/leu2-3,112*

yCHS69 *Matα-inc/a-inc ade2-1/ade2-1 can1-100/can1-100* This Study

*his3∆3'-(16bp)-HOcs(117bp)/his3Δ5' trp1::KANMX-GALHO/trp1-1*

*ura3::TRIP1/ura3-1 leu2-3,112/leu2-3,112*

yCHS88 *Mata-inc/a-inc ade2-1/ade2-1 can1-100/can1-100* This Study

*his3∆3'-(14-2-9 bp)-HOcs(117bp)/his3Δ5' ura3::TRP1/URA3*

*leu2-3,112/leu2-3,112 trp1::KANMX-GALHO/trp1-1*

yCHS90 *Mata-inc/a-inc ade2-1/ade2-1 can1-100/can1-100* This Study

*his3∆3'-(20bp)-HOcs(117bp)/his3Δ200 ura3::TRP1/URA3*

*leu2::his3∆5'/leu2-3,112 trp1::KANMX-GALHO/trp1-1*

yCHS91 *Mata-inc/a-inc ade2-1/ade2-1 can1-100/can1-100* This Study

*his3∆3'-(25bp)-HOcs(117bp)/his3Δ200 ura3::TRP1/URA3*

*leu2::his3∆5'/leu2-3,112 trp1::KANMX-GALHO/trp1-1*

yCHS90 *Mata-inc/a-inc ade2-1/ade2-1 can1-100/can1-100* This Study

*his3∆3'-(311bp)-HOcs(117bp)/his3Δ200 ura3::TRP1/URA3*

*leu2::his3∆5'/leu2-3,112 trp1::KANMX-GALHO/trp1-1*
